# Supplementary material for: Loss of Interleukin-13-Receptor-Alpha-1 Induces Apoptosis and Promotes EMT in Pancreatic Cancer
Source: MDPI journal article supplement (doi:10.3390/ijms23073659), 2022-03-26
Supplement: s1 [file s1]

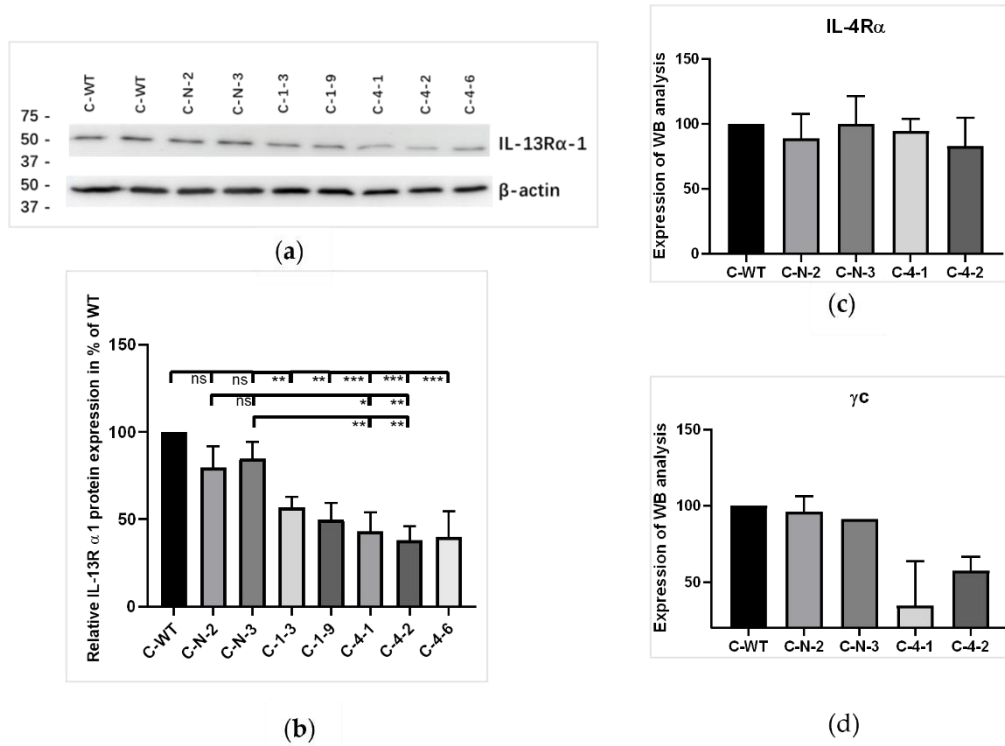

**Figure S1. Expression of IL-13Rα1, IL-4Rα and γC in C-WT, C-N and C-KD clones.** (a) Immunoblot analysis of IL-13Rα1 expressed in cell lysates. β-actin was used as loading control. One representative of 3 blots is shown; (b) Relative levels of IL-13Rα1 protein expressed in C-WT, C-N and C-KD clones. Results are shown as IL-13Rα1/β-actin in % (±SD) compared to C-WT and are means of 3 separate experiments (ns  $p > 0.05$ , \*  $p < 0.05$ , \*\*  $p < 0.01$ , \*\*\*  $p < 0.001$ ); Quantitative expression of IL-4Rα (c) and γC (d) was obtained by analyzing 3 and 2 times of immunoblottings respectively, while GAPDH was used as internal control.

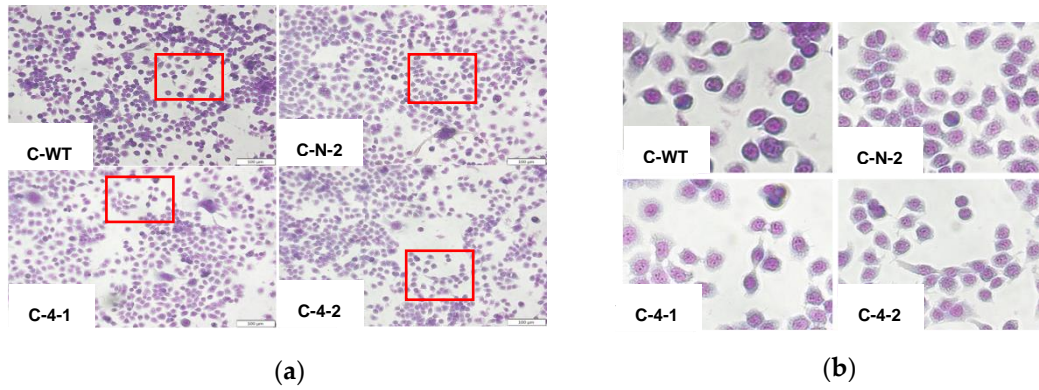

**Figure S2. C-WT, C-N and C-KD cells stained by Giemsa staining solution.** (a) Giemsa-stained C-WT, C-N-2, C-4-1 and C-4-2 clones. Photos were taken under reverse light microscope at 20x magnification. Scale bar: 100  $\mu$ m. There is no significant difference in cell morphology among 4 groups; (b) Representative stained cells shown at 20x2x magnification. Pictures shown are amplified areas marked by red box in (a).

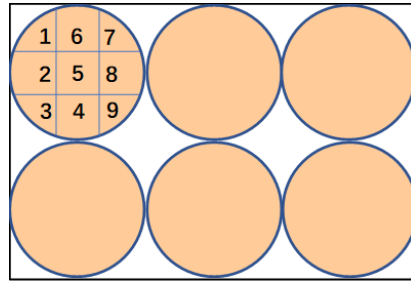

**Figure S3. Positions to take photos of the 6-well plate.** Photos were taken at the positions shown in a well of the 6-well plate, from 1 to 9, by moving the plate under the microscope.

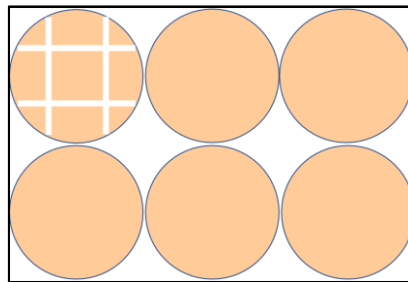

**Figure S4. Wounds scratched in the 6-well plate.** Primary wounds (white lines) with same gap distance were scratched on the bottom of wells attached by single-layer cells in the 6-well plate using sterile 200  $\mu$ l yellow tips.

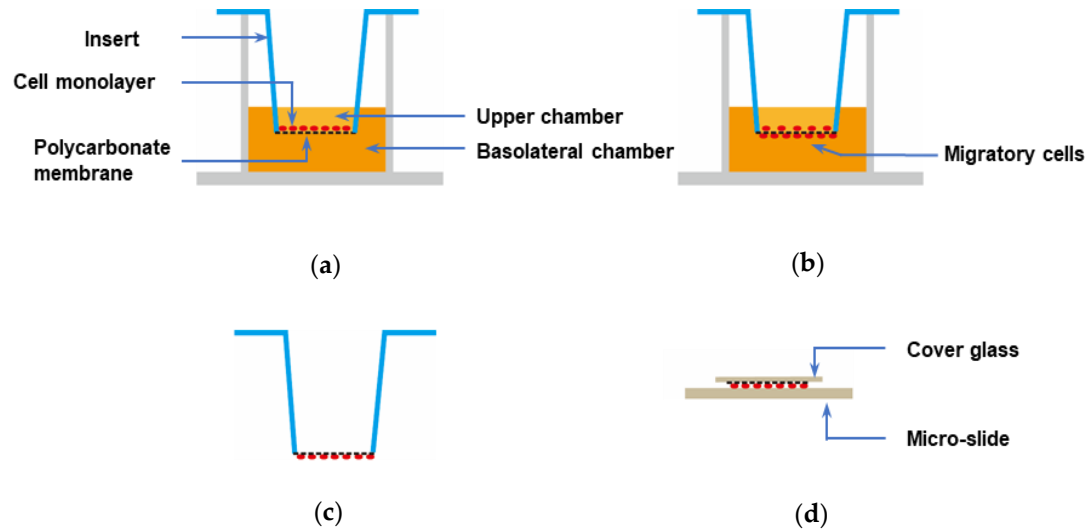

**Figure S5. Modified Boyden Chamber assay.** (a)  $5 \times 10^4$  cells were seed into an insert containing 100  $\mu\text{l}$  of medium containing 1% FCS, while 600  $\mu\text{l}$  of medium containing 10% FCS was added into the basolateral chamber; (b) Cells were allowed to migrate from the upper chamber with low serum to the basolateral chamber with high serum within 24 h; (c) Non-migratory cells on the upper side of the membrane were scraped off with wet cotton swabs, while migratory cells on the underside of the membrane were rinsed by dH<sub>2</sub>O, fixed with 4% paraformaldehyde and stained with DAPI; (d) Polycarbonate membranes were cut from inserts and placed on microscope slides. 6 photos were taken at random under reverse fluorescence microscope. **Abbreviations:** FCS: fetal calf serum; DAPI: 4',6-diamidino-2-phenylindole.

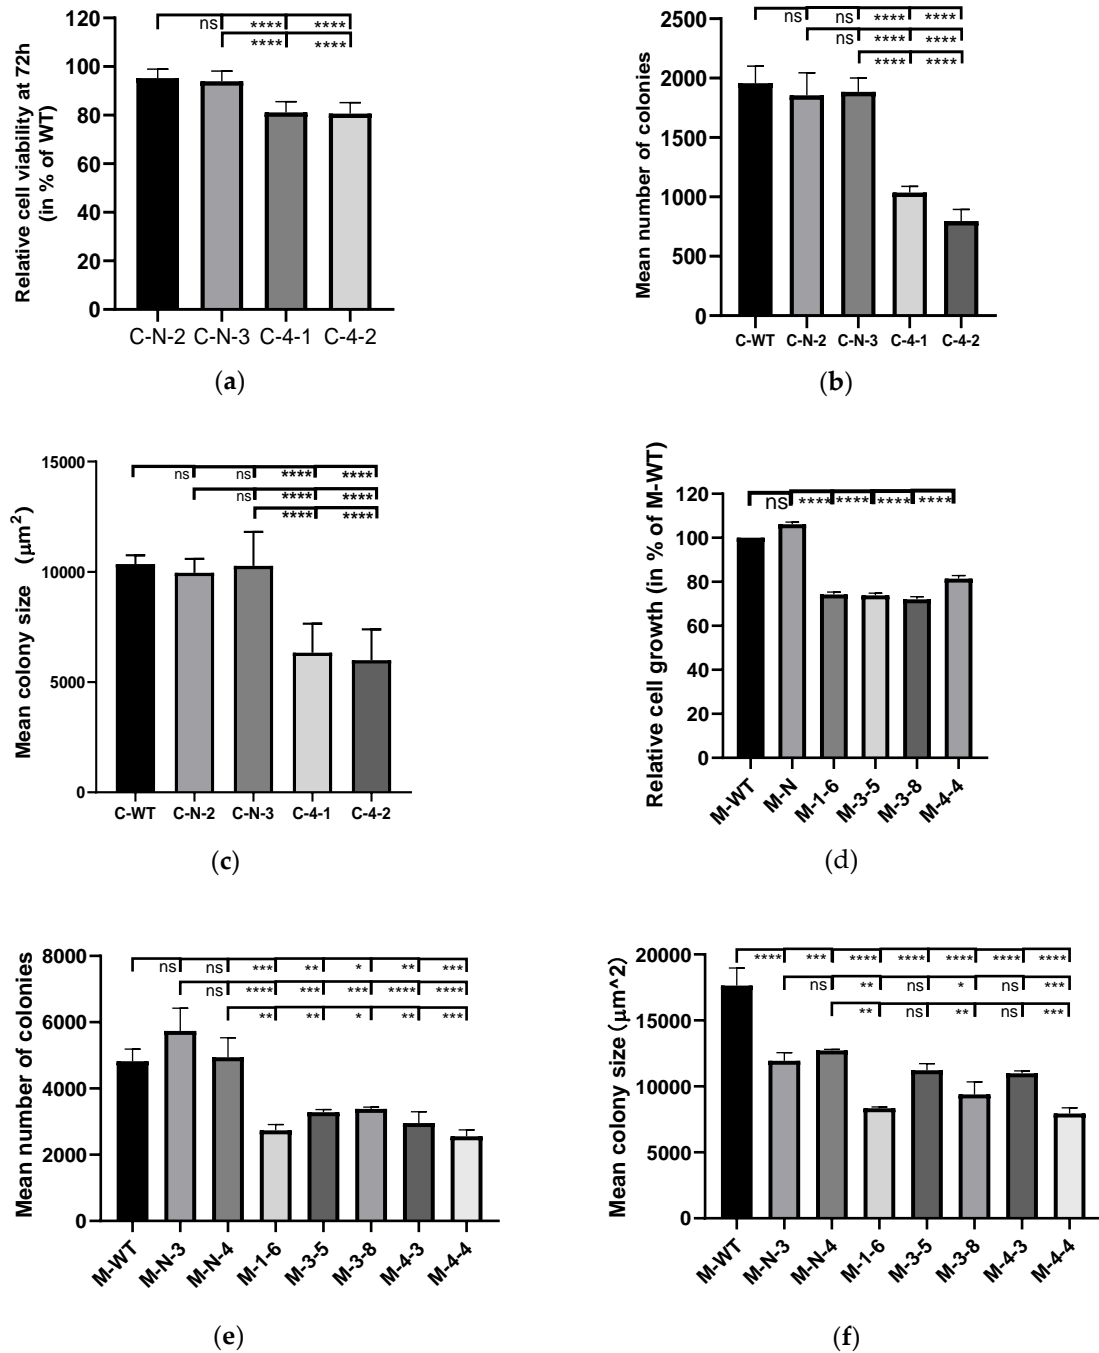

**Figure S6. Effect of IL-13Rα1-downregulation on the basal growth of pancreatic cancer cells.** (a, d) Anchorage-dependent growth in the MTT assay. Relative cell viability of Capan-1 cells (a) and MIA PaCa-2 cells (d) at 72 h was shown. Data are shown as mean cell viability in % (±SEM) compared to WT and are means of 4 and 3 independent experiments of quadruplicate determinations respectively. (b-c, e-f) Anchorage-independent growth in the colony formation assay. (b) Mean number of Capan-1 colonies larger than 50 μm² (±SEM) and (c) mean colony size of the largest 10 colonies μm² (±SEM) in one well (9.4 cm²) of a 6-well plate. Colony number and size were automatically calculated using ImageJ 1.52a. Data shown are means of 3 independent experiments. (e) Mean number of MIA PaCa-2 colonies (±SEM) and (f) mean colony size in μm² (±SEM) in one well (9.4 cm²) of 6-well plate. Data shown as means of 3 independent experiments. (ns  $p > 0.05$ , \*  $p < 0.05$ , \*\*  $p < 0.01$ , \*\*\*\*  $p < 0.0001$ ).

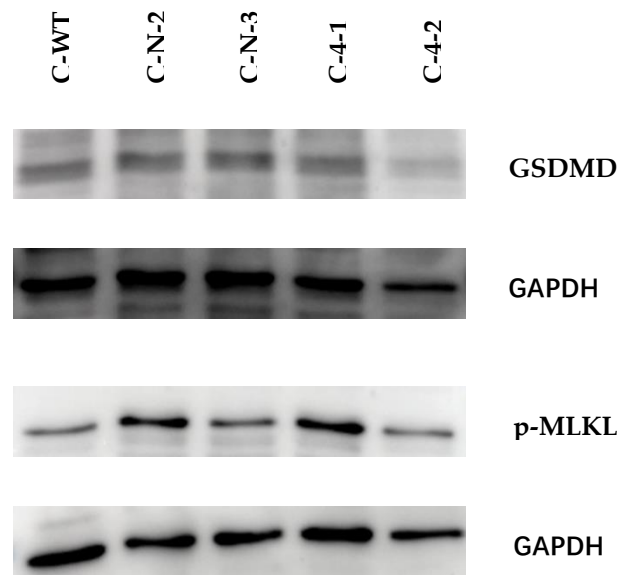

**Figure S7. Immunoblot analysis of GSDMD and p-MLKL.** Expression of GSDMD and p-MLKL was determined in the cell lysates of Capan-1 wild type, sham-transfected clones and Capan-1-IL-13R $\alpha$ 1-knockdown clones. The increase in GSDMD (Gasdermin D) and p-MLKL (phospho-mixed lineage kinase domain-like protein) indicate the induction of pyroptosis and necroptosis respectively, which was not shown in the present project.

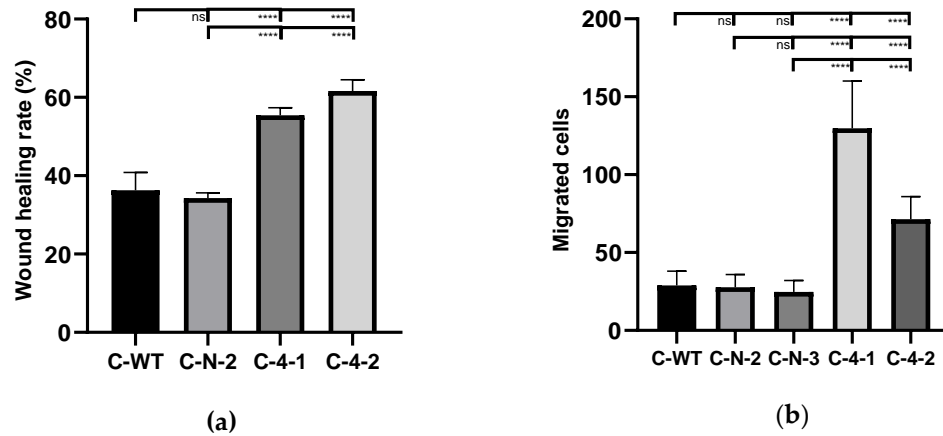

**Figure S8. Effect of IL-13R $\alpha$ 1-downregulation on cell mobility and migration of pancreatic cancer cell clones.** **(a)** Cell mobility in the wound healing assay. Wound healing rate represents the cell mobility and data are shown as means  $\pm$  SEM of (A-B)/A\*100% (A is the wound gap at 0 h and B is the wound gap at 24 h after scratch) and are means of 3 independent experiments of quadruplicate determinations. **(b)** Directed migration in the modified Boyden-Chamber-Assay. Results are migrated cells per high power field (HPF). Data are shown as mean number of migrated cells within 24 h ( $\pm$ SEM) and are means of 6 independent experiments. (ns  $p > 0.05$ , \*\*\*\*  $p < 0.0001$ ).
